# Supplementary material for: Exonic CLDN16 mutations associated with familial hypomagnesemia with hypercalciuria and nephrocalcinosis can induce deleterious mRNA alterations
Source: PubMed Central journal article supplement (PMC6325764; doi:10.1186/s12881-018-0713-7), 2019-01-08
Supplement: 12881_2018_713_MOESM1_ESM.pdf [file 12881_2018_713_MOESM1_ESM.pdf]

**Table S1.** Primers used in the construction of the minigene and the site directed mutagenesis

| Primer (5'-3')                   |                                          |             |
|----------------------------------|------------------------------------------|-------------|
| <i>PCR amplification</i>         |                                          | <i>Size</i> |
| C16 E2 F                         | <u>TTATCTCGAGT</u> GCTATCAAAC            | 270 pb      |
| C16 E2 R                         | TATTTCTAGATTCTGTCCCTTT                   |             |
| C16 E3 F                         | <u>TTATGGATCC</u> TTACCGGAGG             | 389 pb      |
| C16 E3 R                         | TATTTCTAGATGAGCAGCTTC                    |             |
| C16 E4 F                         | <u>TTATCTCGAGT</u> TGCCCATGAA            | 388 pb      |
| C16 E4 R                         | TATTTCTAGACGATAGTGGAG                    |             |
| <i>Site Directed Mutagenesis</i> |                                          |             |
| p.(R114Q) F                      | GAGCACAAAATGCCAAGGCCT                    |             |
| p.(R114Q) R                      | CCCACCAGAGGCCTTGGCATT                    |             |
| p.(A139V) F                      | GTACGATTCCATACTTGTGGAGCATCCCTGTACGT      |             |
| p.(A139V) R                      | ACGTACAGGGATGCTCCACAAGTATGGAATCGTAC      |             |
| p.(H141D) F                      | TTCCATACTTGC GGAGGATCCCTGTACGTATGC       |             |
| p.(H141D) R                      | GCATACGTACAGGGATCCTCCGCAAGTATGGAA        |             |
| p.(L145P) F                      | GTCTTCCAGTGAAGCCGGTGGTAACTCGAGC          |             |
| p.(L145P) R                      | GCTCGAGTTACCACCGCTTCACTGGAAGAC           |             |
| p.(R149Q) F                      | GAAGCTGGTGGTAACTCAAGCGTTGATGATTACTG      |             |
| p.(R149Q) R                      | CAGTAATCATCAACGCTTGAGTTACCACCAGCTTC      |             |
| p.(R149L) F                      | GAAGCTGGTGGTAACTCTAGCGTTGATGATTACTG      |             |
| p.(R149L) R                      | CAGTAATCATCAACGCTAGAGTTACCACCAGCTTC      |             |
| p.(L151W) F                      | GGTGGTAACTCGAGCGTGGATGATTACTGCAGATA      |             |
| p.(L151W) R                      | TATCTGCAGTAATCATCCACGCTCGAGTTACCACC      |             |
| p.(L151F) F                      | CTGGTGGTAACTCGAGCGTTTATGATTACTGCAGATATTC |             |
| p.(L151F) R                      | GAATATCTGCAGTAATCATAAACGCTCGAGTTACCACCAG |             |
| p.(G198D) F                      | ATCCTCCCTTTCTTTTCAGATACCCCAGGAATCATTG    |             |
| p.(G198D) R                      | CAATGATTCCTGGGGTATCTGAAAGAAAGGGAGGAT     |             |
| p.(G198A) F                      | TCCTCCCTTTCTTTTCAGCTACCCCAGGAATCATT      |             |
| p.(G198A) R                      | AATGATTCCTGGGGTAGCTGAAAGAAAGGGAGGA       |             |
