# Supplementary material for: Exonic CLDN16 mutations associated with familial hypomagnesemia with hypercalciuria and nephrocalcinosis can induce deleterious mRNA alterations
Source: PubMed Central journal article supplement (PMC6325764; doi:10.1186/s12881-018-0713-7), 2019-01-08
Supplement: 12881_2018_713_MOESM2_ESM.pdf [file 12881_2018_713_MOESM2_ESM.pdf]

**Table S2.** Bioinformatics predictions of splicing defects for *CLDN16* exonic mutations and comparison with experimental results.

| Mutation           | Exon | MutPred Splice |                      | SPANR     | Human Splicing Finder     | Minigene result  |
|--------------------|------|----------------|----------------------|-----------|---------------------------|------------------|
|                    |      | Result         | Confident hypothesis | PSI       | Confident hypothesis      |                  |
| c.341G>A p.(R114Q) | 2    | SNV            | ---                  | Decreased | New ESS/ESE Site Broken   | No effect        |
| c.416C>T p.(A139V) | 2    | SNV            | ---                  | Increased | No significant alteration | No effect        |
| c.421C>G p.(H141D) | 2    | SNV            | ---                  | No effect | ESE Site Broken           | No effect        |
| c.434T>C p.(L145P) | 3    | SNV            | ---                  | No effect | ESE Site Broken           | No effect        |
| c.446G>A p.(R149Q) | 3    | SNV            | ---                  | Decreased | ESE Site Broken           | No effect        |
| c.446G>T p.(R149L) | 3    | SNV            | ---                  | Decreased | ESE Site Broken           | Truncated exon 3 |
| c.452T>G p.(L151W) | 3    | SNV            | ---                  | Increased | No significant alteration | No effect        |
| c.453G>T p.(L151F) | 3    | SNV            | ---                  | No effect | ESE Site Broken           | Truncated exon 3 |
| c.485G>T p.(G162V) | 3    | SAV            | ESS Gain             | No effect | ESE Site Broken           | No effect        |
| c.571G>A p.(G191R) | 3    | SNV            | ---                  | Decreased | ESE Site Broken/New 3' SS | Exon 4 skipping  |
| c.593G>A p.(G198D) | 4    | SAV            | ---                  | No effect | No significant alteration | Exon 4 skipping  |
| c.593G>C p.(G198A) | 4    | SAV            | Loss of 3' SS        | No effect | No significant alteration | Exon 4 skipping  |

PSI, percentage of transcripts with exón incorporated; SNV, splicing neutral variant; SAV, splicing affecting variant; (---), no effect; ESS, exonic splicing enhancer; ESE, exonic splicing enhancer; SS, splice site
