# Supplementary material for: Exonic CLDN16 mutations associated with familial hypomagnesemia with hypercalciuria and nephrocalcinosis can induce deleterious mRNA alterations
Source: PubMed Central journal article supplement (PMC6325764; doi:10.1186/s12881-018-0713-7), 2019-01-08
Supplement: 12881_2018_713_MOESM3_ESM.pdf [file 12881_2018_713_MOESM3_ESM.pdf]

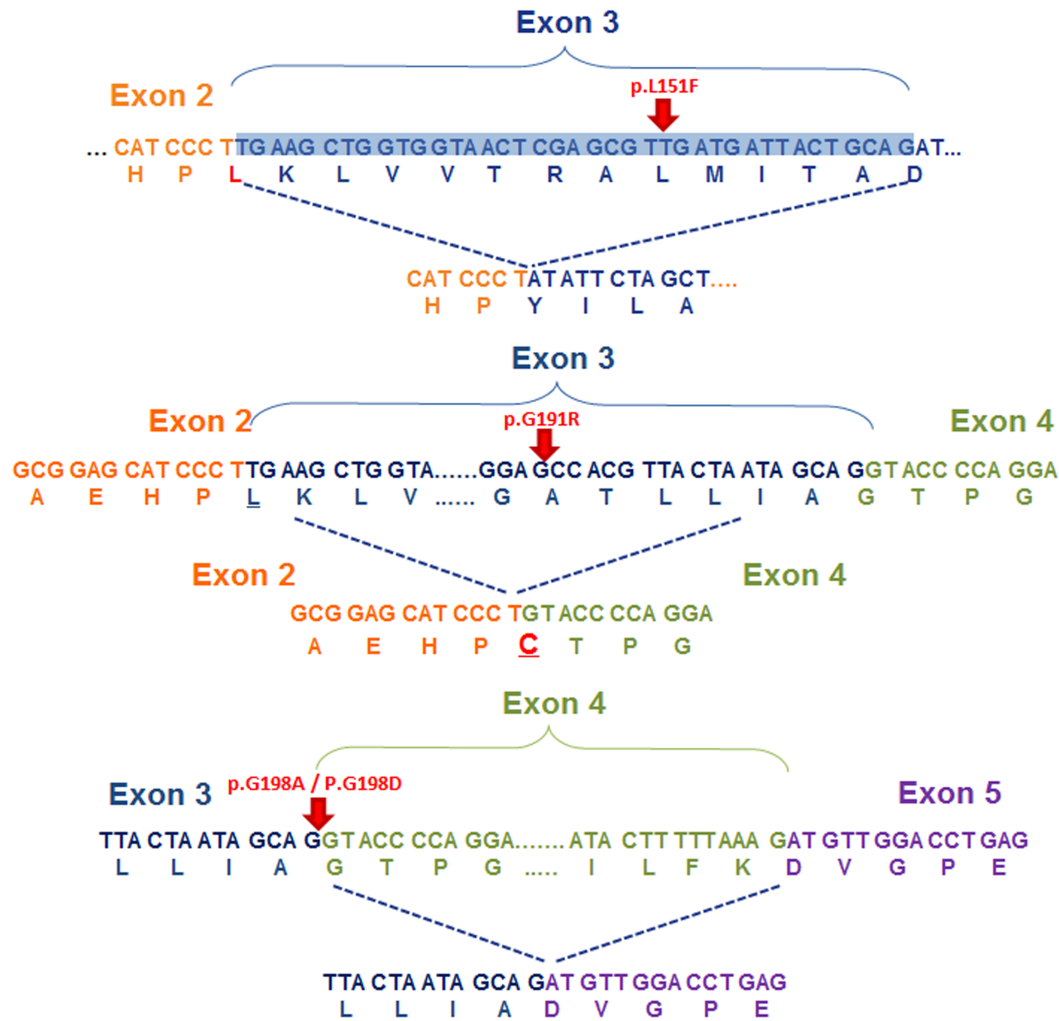

**Fig. S3.** Precise nature of aberrant transcripts as deduced by DNA sequences and predicted exon fusions. Arrows and brackets indicate the position of mutations and the nucleotides/amino acids lost with each mutation, respectively.
